# Supplementary material for: Use of Personal Resources May Influence the Rate of Biological Aging Depending on Individual Typology
Source: Eur J Investig Health Psychol Educ. 2022 Dec 2;12(12):1793–811. doi: 10.3390/ejihpe12120126 (PMC9778189; doi:10.3390/ejihpe12120126)
Supplement: Supplementary file 1 [file ejihpe-12-00126-s001.zip › ejihpe-1898170-supplementary.pdf]

**Supplementary Table S1. Correlation between the RBA index and personal resources among representatives of different professional types (women).**

| Types | Sports | Order   | Creativity | Intellect | Handwork | Kindness | Humour  | Spirituality | Risk  | Communication | Nature  | Achievements | Optimism |
|-------|--------|---------|------------|-----------|----------|----------|---------|--------------|-------|---------------|---------|--------------|----------|
| 1     | 0.01   | 0.12    | 0.18       | -0.03     | -0.15    | -0.42*** | 0.13    | 0.02         | 0.09  | -0.28*        | 0       | -0.09        | -0.27*   |
| 2     | -0.28  | -0.48** | -0.3       | -0.33*    | -0.03    | 0.03     | -0.43** | -0.47**      | 0.16  | -0.4*         | -0.12   | 0.02         | -0.47**  |
| 3     | -0.1   | 0.13    | 0          | 0.1       | 0        | -0.21**  | -0.15*  | 0.04         | 0.16* | -0.23***      | 0.01    | -0.06        | -0.01    |
| 4     | -0.09  | -0.36*  | 0.31*      | -0.22     | -0.26    | -0.37*   | -0.08   | 0.42*        | 0.48* | -0.27         | -0.47** | -0.32*       | -0.27    |
| 5     | -0.11  | -0.01   | 0.18       | 0.41      | -0.85*** | 0.37     | 0.11    | -0.02        | -0.14 | -0.07         | -0.23   | 0.29         | 0.5*     |

1 - Realistic, 2 - Investigative, 3 - Social, 4 - Conventional, 5 - Enterprising type, ( \* - p<0.05; \*\* - p<0.01; \*\*\* - p<0.001)

In the Supplementary Table 1, among the female representatives of professions of the *Realistic* type, the RBA index is negatively associated with the resources *Kindness*, *Communication*, *Optimism*. For the female representatives of *Investigative* professions, the RBA index is negatively associated with resources *Order*, *Intellect* (*intellectual hobbies*), *Humour*, *Spirituality*, *Communication*, *Optimism*. In female representatives of the *Social* type of professions, the RBA index is negatively related to the following resources: *Kindness*, *Humour*, *Communication*, and positively - to the resource *Risk* (the presence of risky hobbies). In women representatives of the *Conventional* type of professions, the RBA index is negatively related to resources *Order*, *Kindness*, *Nature*, *Achievements*; and positively - to *Creativity*, *Spirituality*, *Risk*. The female representatives of the *Enterprising* type of professions have an RBA index that negatively correlates with the *Handwork* resource (subject hobbies), and positively - with the resource *Optimism*.

**Supplementary Table S2. Correlation between the biological aging index and personal resources in representatives of different family types (women).**

| Types | Sports  | Order | Creativity | Intellect | Handwork | Kindness | Humour | Spirituality | Risk    | Communication | Nature | Achievements | Optimism |
|-------|---------|-------|------------|-----------|----------|----------|--------|--------------|---------|---------------|--------|--------------|----------|
| 1     | -0.2    | -0.09 | 0.08       | -0.18     | -0.14    | -0.29**  | 0.14   | 0.43***      | 0.47*** | -0.24*        | -0.16  | -0.29**      | -0.22*   |
| 2     | -0.02   | -0.03 | 0.17*      | -0.01     | 0.05     | -0.27**  | -0.15  | 0.12         | 0.1     | -0.43***      | -0.11  | -0.14        | -0.22*   |
| 3     | -0.24** | 0.06  | -0.11      | 0.07      | -0.14    | -0.11    | -0.17* | -0.18*       | 0.1     | -0.1          | -0.07  | -0.01        | 0.02     |

1 - singles, 2 - divorced, 3 - married, ( \* - p<0.05; \*\* - p<0.01; \*\*\* - p<0.001)

As the Supplementary Table 2 shows, in single women, the RBA index is negatively related to resources *Kindness*, *Communication*, *Achievements*, *Optimism*, and positively - to *Spirituality* and *Risk*. In divorced women, the biological aging index is negatively associated with resources *Kindness*,

*Communication, Optimism, and positively - with Creativity. In married women, the RBA index negatively correlated to resources Sports, Humour, Spirituality.*

**Supplementary Table S3. Correlation between the biological aging index and personal resources in women with and without children.**

| Types | <i>Sports</i> | <i>Order</i> | <i>Creativity</i> | <i>Intellect</i> | <i>Handwork</i> | <i>Kindness</i> | <i>Humour</i> | <i>Spirituality</i> | <i>Risk</i> | <i>Communication</i> | <i>Nature</i> | <i>Achievements</i> | <i>Optimism</i> |
|-------|---------------|--------------|-------------------|------------------|-----------------|-----------------|---------------|---------------------|-------------|----------------------|---------------|---------------------|-----------------|
| 1     | -0.06         | 0.02         | 0.11              | -0.07            | 0.01            | -0.27*          | -0.02         | 0.42**              | 0.6 ***     | -0.18                | -0.11         | -0.08               | -0.09           |
| 2     | -0.14*        | 0            | 0.03              | -0.01            | -0.13*          | -0.22 ***       | -0.1          | -0.02               | 0.12*       | -0.25 ***            | -0.11*        | -0.12*              | -0.1            |

1 - childless, 2 - having children, (\* -  $p < 0.05$ ; \*\* -  $p < 0.01$ ; \*\*\* -  $p < 0.001$ )

Supplementary Table 3 shows that in women who do not have children, the biological aging index is negatively related to resource *Kindness*, and positively - to *Spirituality* and *Risk*. In women with children, the RBA index is negatively associated with resources *Handwork*, *Kindness*, *Nature*, *Communication*, *Achievements*, and positively - with *Risk*.

**Supplementary Table S4. Correlation between the RBA index and personal resources in women with different types of functional asymmetry.**

| Types | <i>Sports</i> | <i>Order</i> | <i>Creativity</i> | <i>Intellect</i> | <i>Handwork</i> | <i>Kindness</i> | <i>Humour</i> | <i>Spirituality</i> | <i>Risk</i> | <i>Communication</i> | <i>Nature</i> | <i>Achievements</i> | <i>Optimism</i> |
|-------|---------------|--------------|-------------------|------------------|-----------------|-----------------|---------------|---------------------|-------------|----------------------|---------------|---------------------|-----------------|
| 1     | 0.21          | 0.46         | 0.39              | 0.35             | -0.47           | -0.66*          | 0.48          | 0.8**               | 0.68*       | 0.33                 | -0.15         | 0.49                | 0.61*           |
| 2     | 0.46          | -0.29        | 0.37              | -0.08            | 0.11            | -0.2            | 0.19          | -0.36               | 0.65 **     | -0.79 ***            | -0.37         | -0.1                | -0.38           |
| 3     | -0.18 **      | 0            | -0.01             | -0.01            | -0.09           | -0.2**          | -0.13*        | -0.01               | 0.15*       | -0.22 ***            | -0.1          | -0.11               | -0.1            |

1 - left-handed, 2 – ambidexter, 3 - right-handed, (\* -  $p < 0.05$ ; \*\* -  $p < 0.01$ ; \*\*\* -  $p < 0.001$ )

As can be seen in the Supplementary Table 4, in left-handed women, the RBA index is negatively associated with the resources *Kindness* and positively - with the resources *Spirituality*, *Risk*, *Optimism*. In ambidexter women, the RBA index is negatively related to the *Communication* resource and positively - to the *Risk* resource. In right-handed women, the RBA index negatively correlates with resources *Sports*, *Kindness*, *Humour*, *Communication*, and positively - with *Risk*.

**Supplementary Table S5. Correlation between the RBA index and personal resources in representatives of different body types (women).**

| Types | <i>Sports</i> | <i>Order</i> | <i>Creativity</i> | <i>Intellect</i> | <i>Handwork</i> | <i>Kindness</i> | <i>Humour</i> | <i>Spirituality</i> | <i>Risk</i> | <i>Communication</i> | <i>Nature</i> | <i>Achievements</i> | <i>Optimism</i> |
|-------|---------------|--------------|-------------------|------------------|-----------------|-----------------|---------------|---------------------|-------------|----------------------|---------------|---------------------|-----------------|
| 1     | -0.06         | -0.3*        | -0.17             | -0.02            | 0.12            | -0.05           | -0.35*        | -0.25               | 0.06        | -0.56 ***            | -0.17         | -0.22               | -0.22           |

|   |        |      |      |      |              |              |       |              |             |              |             |       |        |
|---|--------|------|------|------|--------------|--------------|-------|--------------|-------------|--------------|-------------|-------|--------|
| 2 | -0.04  | 0.14 | 0.08 | 0.09 | -0.28<br>*** | -0.35<br>*** | -0.01 | 0.01         | 0.06        | -0.37<br>*** | 0.18 *      | 0.01  | -0.18* |
| 3 | -0.15  | -0.1 | 0.17 | -0.4 | 0.21         | -0.02        | 0.09  | -0.61<br>*** | 0.1         | -0.44<br>**  | -0.42<br>** | -0.24 | -0.25  |
| 4 | -0.17* | 0.07 | 0.01 | 0.01 | -0.12        | -0.23<br>**  | -0.08 | 0.3<br>***   | 0.29<br>*** | 0            | -0.2*       | -0.14 | 0.07   |

1 - asthenic, 2 - picnic, 3 - athletic, 4 - indefinite (harmonious), (\* -  $p<0.05$ ; \*\* -  $p<0.01$ ; \*\*\* -  $p<0.001$ ).

Supplementary Table 5 demonstrates that, in asthenic women, the RBA index is negatively related to resources *Order*, *Humour*, *Communication*. In picnic women, the RBA index is negatively associated with resources *Handwork*, *Kindness*, *Communication*, *Optimism*. In female athletes, the RBA index negatively correlates with resources *Spirituality*, *Communication*, *Nature*. In women of indefinite physique, the RBA index is negatively related to resources *Sports*, *Kindness*, *Nature*, and positively - to resources *Spirituality* and *Risk*.

**Supplementary Table S6. Correlation between the RBA index and personal resources in representatives of different types of emotionality (women).**

| Types | <i>Sports</i> | <i>Order</i> | <i>Creativity</i> | <i>Intellect</i> | <i>Handwork</i> | <i>Kindness</i> | <i>Humour</i> | <i>Spirituality</i> | <i>Risk</i> | <i>Communication</i> | <i>Nature</i> | <i>Achievements</i> | <i>Optimism</i> |
|-------|---------------|--------------|-------------------|------------------|-----------------|-----------------|---------------|---------------------|-------------|----------------------|---------------|---------------------|-----------------|
| 1     | -0.31<br>**   | -0.09        | -0.23<br>*        | -0.11            | -0.26*          | -0.27<br>**     | -0.19         | -0.37<br>***        | 0           | -0.47<br>***         | -0.11         | -0.11               | -0.48<br>***    |
| 2     | -0.02         | -0.12        | -0.14             | 0.09             | 0.09            | -0.11           | -0.22         | -0.02               | 0.27*       | -0.31<br>**          | -0.32<br>**   | -0.15               | -0.08           |
| 3     | -0.13         | 0.05         | 0.13              | 0                | -0.08           | -0.17<br>*      | -0.07         | 0.16*               | 0.19*       | -0.1                 | -0.08         | -0.11               | 0               |

1 - psychomotor, 2 - intellectual, 3 - communicative, (\* -  $p<0.05$ ; \*\* -  $p<0.01$ ; \*\*\* -  $p<0.001$ ).

In women with psychomotor emotionality, the RBA index is negatively related to resources *Sports*, *Creativity*, *Handwork*, *Kindness*, *Spirituality*, *Communication*, *Optimism*. In women with intellectual emotionality, the RBA index negatively correlates with resources *Communication*, *Nature*, and positively - with *Risk*. In women with communicative emotionality, the RBA index is negatively associated with resource *Kindness* and positively - with *Spirituality* and *Risk*.

**Supplementary Table S7. Correlation between the RBA index and personal resources among representatives of different types of interaction (women).**

| Types | <i>Sports</i> | <i>Order</i> | <i>Creativity</i> | <i>Intellect</i> | <i>Handwork</i> | <i>Kindness</i> | <i>Humour</i> | <i>Spirituality</i> | <i>Risk</i> | <i>Communication</i> | <i>Nature</i> | <i>Achievements</i> | <i>Optimism</i> |
|-------|---------------|--------------|-------------------|------------------|-----------------|-----------------|---------------|---------------------|-------------|----------------------|---------------|---------------------|-----------------|
| 1     | -0.52<br>**   | -0.35        | -0.14             | -0.61<br>***     | -0.33           | -0.01           | -0.26         | -0.04               | 0.42*       | -0.17                | -0.12         | -0.28               | -0.29           |
| 2     | 0.05          | 0.2*         | 0.26<br>**        | 0.25**           | -0.18*          | -0.31<br>***    | 0.01          | 0.18*               | 0.23<br>**  | -0.19*               | 0.04          | 0.13                | -0.04           |
| 3     | -0.25<br>**   | -0.11        | -0.27<br>***      | -0.12            | 0.09            | -0.12           | -0.19*        | -0.12               | 0.01        | -0.33<br>***         | -0.3<br>***   | -0.3<br>***         | -0.1            |

1 - competitive, 2 - compromising, 3 - collaborating, (\* -  $p<0.05$ ; \*\* -  $p<0.01$ ; \*\*\* -  $p<0.001$ ).

As can be seen in the Supplementary Table 7, in women who prefer competition in relationships, the RBA index is negatively related to resources *Sports*, *Intellect*, and positively - to *Risk*. In women who choose a compromise, the RBA index negatively correlates with resources *Handwork*, *Kindness*,

*Communication* and positively - with resources *Order, Creativity, Intellect, Spirituality, Risk*. In women who prefer cooperation in interactions, the RBA index is negatively associated with resources *Sports, Creativity, Humour, Communication, Nature, Achievements*.

**Supplementary Table S8. Correlation of the RBA index with personal resources for women living in different types of residence area.**

| Types | <i>Sports</i> | <i>Order</i> | <i>Creativity</i> | <i>Intellect</i> | <i>Handwork</i> | <i>Kindness</i> | <i>Humour</i> | <i>Spirituality</i> | <i>Risk</i> | <i>Communication</i> | <i>Nature</i> | <i>Achievements</i> | <i>Optimism</i> |
|-------|---------------|--------------|-------------------|------------------|-----------------|-----------------|---------------|---------------------|-------------|----------------------|---------------|---------------------|-----------------|
| 1     | -0.2*         | 0.08         | -0.14             | 0.03             | 0.07            | -0.14           | 0.11          | -0.18               | -0.05       | -0.08                | -0.12         | -0.05               | -0.04           |
| 2     | -0.17*        | -0.15*       | -0.09             | -0.24***         | -0.06           | -0.27***        | -0.16*        | -0.04               | 0.12        | -0.4***              | -0.17*        | -0.32***            | -0.26***        |
| 3     | -0.14         | 0.09         | 0.08              | 0.36*            | -0.33*          | 0.02            | -0.31*        | 0.17                | 0.33*       | 0.11                 | -0.03         | 0.15                | 0.19            |

1 – rural areas, 2 - urban areas, 3 - capital, (\* -  $p < 0.05$ ; \*\* -  $p < 0.01$ ; \*\*\* -  $p < 0.001$ ).

For women living in rural areas, the RBA index negatively correlates with resource *Sports*. For women living in urban areas, the RBA index is negatively related to resources *Sports, Order, Intellect, Kindness, Humour, Communication, Nature, Achievements, Optimism*. For women living in the capital, the RBA index is negatively associated with resources *Intellect, Handwork, Humour*, and positively - with resources *Intellect* and *Risk*. Results of correlation analysis for the male sample are presented in Supplementary Tables 9-16.

**Supplementary Table S9. Correlation between the RBA index and personal resources among representatives of different professional types (men).**

| Types | <i>Sports</i> | <i>Order</i> | <i>Creativity</i> | <i>Intellect</i> | <i>Handwork</i> | <i>Kindness</i> | <i>Humour</i> | <i>Spirituality</i> | <i>Risk</i> | <i>Communication</i> | <i>Nature</i> | <i>Achievements</i> | <i>Optimism</i> |
|-------|---------------|--------------|-------------------|------------------|-----------------|-----------------|---------------|---------------------|-------------|----------------------|---------------|---------------------|-----------------|
| 1     | -0.03         | -0.03        | -0.12             | 0.01             | 0.21**          | 0.29***         | 0.14          | 0.05                | 0.19*       | 0.08                 | 0.2*          | 0.09                | 0.17*           |
| 3     | 0.28          | 0.12         | 0.16              | -0.01            | 0.22            | 0.24            | 0.18          | 0.12                | 0.23        | -0.06                | 0.23          | -0.1                | -0.14           |
| 4     | -0.1          | -0.45        | 0.42              | -0.09            | 0.11            | 0.34            | 0.01          | 0.57*               | -0.44       | -0.51                | 0.02          | 0.76**              | -0.22           |
| 5     | -0.09         | -0.05        | -0.26             | 0.17             | 0.21            | -0.11           | 0.3           | -0.55**             | -0.53**     | 0.4*                 | 0.03          | 0.13                | -0.09           |

1 - *Realistic*, 2 – *Investigative* (insignificant respondent amount in the sample, for explanation see material and method chapter), 3 - *Social*, 4 - *Conventional*, 5 - *Enterprising* type, (\* -  $p < 0.05$ ; \*\* -  $p < 0.01$ ; \*\*\* -  $p < 0.001$ ).

As can be seen in the Supplementary Table 9, in male representatives of the *Realistic* type of professions, the RBA index is positively associated with resources *Handwork, Kindness, Risk, Nature, Optimism*. In men - representatives of the *Social* type of professions, no significant correlations were found. In male representatives of the *Conventional* type of professions, the RBA index is positively associated with resources *Spirituality* and *Achievements*. In male representatives of the *Enterprising* type of professions, the RBA index is negatively correlated with resources *Spirituality, Risk*, and positively - with the resource *Communication*.

**Supplementary Table S10. Correlation between the RBA index and personal resources in representatives of different family types (men).**

| Types | <i>Sports</i> | <i>Order</i> | <i>Creativity</i> | <i>Intellect</i> | <i>Handwork</i> | <i>Kindness</i> | <i>Humour</i> | <i>Spirituality</i> | <i>Risk</i> | <i>Communication</i> | <i>Nature</i> | <i>Achievements</i> | <i>Optimism</i> |
|-------|---------------|--------------|-------------------|------------------|-----------------|-----------------|---------------|---------------------|-------------|----------------------|---------------|---------------------|-----------------|
| 1     | 0.01          | 0.28*        | 0.08              | 0.05             | -0.01           | 0.13            | 0.28*         | 0.16                | 0.37**      | 0.21                 | 0.01          | 0.1                 | -0.05           |
| 2     | 0.01          | 0.28*        | 0.08              | 0.05             | -0.01           | 0.13            | 0.28*         | 0.16                | 0.37**      | 0.21                 | 0.01          | 0.1                 | -0.05           |
| 3     | -0.08         | -0.09        | 0.05              | 0.06             | 0.31***         | 0.27**          | 0.03          | 0.08                | 0.11        | -0.06                | 0.23*         | 0.01                | 0.01            |

1 - singles, 2 – divorced, 3 – married, (\* -  $p < 0.05$ ; \*\* -  $p < 0.01$ ; \*\*\* -  $p < 0.001$ ).

As the Supplementary Table 10 shows, in single men, the RBA index is positively associated with resources *Order*, *Humour*, *Risk*. The same correlation is observed in divorced men. In married men, the RBA index is positively related to resources *Handwork*, *Kindness*, *Nature*.

**Supplementary Table S11. Correlation between the biological aging index and personal resources in men with and without children.**

| Types | <i>Sports</i> | <i>Order</i> | <i>Creativity</i> | <i>Intellect</i> | <i>Handwork</i> | <i>Kindness</i> | <i>Humour</i> | <i>Spirituality</i> | <i>Risk</i> | <i>Communication</i> | <i>Nature</i> | <i>Achievements</i> | <i>Optimism</i> |
|-------|---------------|--------------|-------------------|------------------|-----------------|-----------------|---------------|---------------------|-------------|----------------------|---------------|---------------------|-----------------|
| 1     | 0.06          | 0.32*        | 0.05              | 0.04             | -0.13           | -0.01           | 0.16          | 0.11                | 0.3*        | 0.1                  | -0.09         | -0.08               | -0.14           |
| 2     | 0             | -0.09        | -0.02             | 0.01             | 0.35***         | 0.35***         | 0.17*         | 0.05                | 0.18**      | 0                    | 0.28***       | 0.08                | 0.17*           |

1 - not having children, 2 - with children, (\* -  $p < 0.05$ ; \*\* -  $p < 0.01$ ; \*\*\* -  $p < 0.001$ ).

For men without children, the RBA index of biological aging is positively associated with resources *Order* and *Risk*. For men with children, the RBA index positively correlates with resources *Handwork*, *Kindness*, *Humour*, *Risk*, *Nature*, *Optimism*.

**Supplementary Table S12. Correlation between the RBA index and personal resources in men with different types of functional asymmetry.**

| Types | <i>Sports</i> | <i>Order</i> | <i>Creativity</i> | <i>Intellect</i> | <i>Handwork</i> | <i>Kindness</i> | <i>Humour</i> | <i>Spirituality</i> | <i>Risk</i> | <i>Communication</i> | <i>Nature</i> | <i>Achievements</i> | <i>Optimism</i> |
|-------|---------------|--------------|-------------------|------------------|-----------------|-----------------|---------------|---------------------|-------------|----------------------|---------------|---------------------|-----------------|
| 1     | -0.5*         | -0.29        | -0.59*            | 0.65**           | 0.85***         | 0.69**          | 0.29          | -0.85***            | 0.35        | -0.69**              | -0.01         | 0.18                | -0.69**         |
| 2     | -0.53         | -0.33        | 0.08              | -0.62*           | 0.44            | -0.5            | -0.08         | -0.09               | 0.62*       | 0.57*                | -0.33         | -0.33               | -0.64*          |
| 3     | 0.03          | 0            | 0.02              | -0.02            | 0.2**           | 0.27***         | 0.17*         | 0.1                 | 0.2**       | 0.02                 | 0.2**         | 0.02                | 0.11            |

1 - left-handed, 2 – ambidexter, 3 - right-handed, (\* -  $p < 0.05$ ; \*\* -  $p < 0.01$ ; \*\*\* -  $p < 0.001$ ).

As can be seen in the Supplementary Table 12, in left-handed men, the RBA index is negatively related to resources *Sports*, *Creativity*, *Spirituality*, *Communication*, *Optimism*, and positively - to resources *Intellect*, *Handwork*, *Kindness*. In ambidexter men, the RBA index is negatively associated with resources

*Intellect, Optimism*, and positively - with resources *Risk* and *Communication*. In right-handed men, the RBA index positively correlates with resources *Handwork, Kindness, Humour, Risk, Nature*.

**Supplementary Table S13. Correlation between the RBA index and personal resources in representatives of different body types (men).**

| Types | <i>Sports</i> | <i>Order</i> | <i>Creativity</i> | <i>Intellect</i> | <i>Handwork</i> | <i>Kindness</i> | <i>Humour</i> | <i>Spirituality</i> | <i>Risk</i> | <i>Communication</i> | <i>Nature</i> | <i>Achievements</i> | <i>Optimism</i> |
|-------|---------------|--------------|-------------------|------------------|-----------------|-----------------|---------------|---------------------|-------------|----------------------|---------------|---------------------|-----------------|
| 1     | 0.1           | -0.17        | -0.23             | -0.02            | -0.28           | 0.32*           | 0.01          | 0.13                | 0.15        | -0.08                | 0             | -0.22               | 0.32*           |
| 2     | 0.29          | 0.1          | 0.08              | 0.22             | 0.55***         | 0.59***         | 0.5**         | 0.08                | 0.48**      | 0.29                 | 0.49**        | -0.05               | 0.24            |
| 3     | -0.1          | 0            | -0.04             | -0.01            | 0.27**          | 0.03            | 0.08          | 0.22**              | 0.24**      | -0.08                | 0.03          | -0.05               | -0.08           |
| 4     | 0.02          | -0.01        | 0.05              | 0.01             | 0.23*           | 0.41***         | 0.28**        | -0.07               | 0.24*       | 0.06                 | 0.38***       | 0.15                | 0.15            |

1 - asthenic, 2 - picnic, 3 - athletic, 4 - indefinite (harmonious) , (\* -  $p<0.05$ ; \*\* -  $p<0.01$ ; \*\*\* -  $p<0.001$ ).

As can be seen in the Supplementary Table 13, in asthenic men the RBA index is positively related to resources *Kindness, Optimism*. In picnic men, the RBA index is positively related to resources *Handwork, Kindness, Humour, Risk, Nature*. In male athletes, the RBA index is positively associated with resources *Handwork, Spirituality, Risk*. In men of indefinite physique, the RBA index is positively associated with resources *Kindness, Humour, Risk, Nature*.

**Supplementary Table S14. Correlation between the RBA index and personal resources in representatives of different types of emotionality (men).**

| Types | <i>Sports</i> | <i>Order</i> | <i>Creativity</i> | <i>Intellect</i> | <i>Handwork</i> | <i>Kindness</i> | <i>Humour</i> | <i>Spirituality</i> | <i>Risk</i> | <i>Communication</i> | <i>Nature</i> | <i>Achievements</i> | <i>Optimism</i> |
|-------|---------------|--------------|-------------------|------------------|-----------------|-----------------|---------------|---------------------|-------------|----------------------|---------------|---------------------|-----------------|
| 1     | -0.14         | -0.17        | 0.13              | 0.1              | 0.31**          | 0.2             | -0.04         | -0.07               | 0.09        | 0.12                 | 0.2           | -0.11               | 0.01            |
| 2     | -0.21         | -0.02        | 0.13              | 0.21             | -0.26           | -0.04           | 0.02          | 0.11                | 0.15        | -0.11                | -0.32         | 0                   | -0.36           |
| 3     | 0.12          | 0.09         | -0.09             | -0.15            | 0.27***         | 0.36***         | 0.3***        | 0.07                | 0.27***     | 0                    | 0.31***       | 0.12                | 0.22**          |

1 - psychomotor, 2 - intellectual, 3 - communicative, (\* -  $p<0.05$ ; \*\* -  $p<0.01$ ; \*\*\* -  $p<0.001$ ).

As can be seen in the Supplementary Table 14, in men with psychomotor emotionality, the RBA index is positively associated with resource *Handwork*. No significant correlations were found in men with intellectual emotionality. In men with communicative emotionality, the RBA index is positively associated with resources *Handwork, Kindness, Humour, Risk, Nature, Optimism*.

**Supplementary Table S15. Correlation between the RBA index and personal resources among representatives of different types of interaction (men).**

| Types | <i>Sports</i> | <i>Order</i> | <i>Creativity</i> | <i>Intellect</i> | <i>Handwork</i> | <i>Kindness</i> | <i>Humour</i> | <i>Spirituality</i> | <i>Risk</i> | <i>Communication</i> | <i>Nature</i> | <i>Achievements</i> | <i>Optimism</i> |
|-------|---------------|--------------|-------------------|------------------|-----------------|-----------------|---------------|---------------------|-------------|----------------------|---------------|---------------------|-----------------|
|-------|---------------|--------------|-------------------|------------------|-----------------|-----------------|---------------|---------------------|-------------|----------------------|---------------|---------------------|-----------------|

|   |       |       |       |       |       |         |       |        |         |       |       |        |       |
|---|-------|-------|-------|-------|-------|---------|-------|--------|---------|-------|-------|--------|-------|
| 1 | 0.3   | 0.02  | -0.02 | -0.17 | 0.33* | 0.54*** | -0.05 | 0.41** | -0.05   | -0.21 | 0.33* | 0.27   | 0.27  |
| 2 | -0.08 | -0.12 | -0.03 | 0.07  | 0.16  | 0.25*   | 0.18  | -0.14  | 0.13    | -0.05 | 0.22* | -0.19  | -0.05 |
| 3 | 0.02  | 0.14  | 0.03  | 0.08  | 0.2*  | 0.25**  | 0.19* | 0.2*   | 0.35*** | 0.06  | 0.16  | 0.26** | 0.13  |

1 – competitive, 2 - compromising, 3 - collaborating, (\* -  $p<0.05$ ; \*\* -  $p<0.01$ ; \*\*\* -  $p<0.001$ ).

As can be seen in the Supplementary Table 15, in men who prefer rivalry in relationships, the RBA index is positively associated with resources *Handwork*, *Kindness*, *Spirituality*, *Nature*. In men who prefer compromise, the RBA index is positively associated with resources *Kindness*, *Nature*. In collaborating men, the RBA index is positively associated with resources *Handwork*, *Kindness*, *Humour*, *Spirituality*, *Risk*, *Achievements*.

**Supplementary Table S16. Correlation of the RBA index with personal resources for men living in different types of residence area.**

| <i>Types</i> | <i>Sports</i> | <i>Order</i> | <i>Creativity</i> | <i>Intellect</i> | <i>Handwork</i> | <i>Kindness</i> | <i>Humour</i> | <i>Spirituality</i> | <i>Risk</i> | <i>Communication</i> | <i>Nature</i> | <i>Achievements</i> | <i>Optimism</i> |
|--------------|---------------|--------------|-------------------|------------------|-----------------|-----------------|---------------|---------------------|-------------|----------------------|---------------|---------------------|-----------------|
| 1            | -0.14         | -0.18        | -0.01             | -0.11            | 0.27**          | 0.29**          | 0.01          | 0.09                | 0.14        | -0.03                | 0.28**        | 0.01                | 0.13            |
| 2            | 0.1           | 0.03         | -0.18             | 0.01             | 0.19            | 0.2*            | 0.28**        | 0.03                | 0.28**      | 0.07                 | 0.15          | -0.1                | 0.02            |
| 3            | 0.13          | 0.02         | 0.16              | 0.11             | 0.05            | 0.26            | 0.21          | 0.07                | 0.17        | -0.02                | 0.08          | 0.09                | -0.04           |

1 – rural areas, 2 - urban areas, 3 - capital, (\* -  $p<0.05$ ; \*\* -  $p<0.01$ ; \*\*\* -  $p<0.001$ ).

As can be seen the Supplementary Table 16, for men living in rural areas, the RBA index is positively associated with resources *Handwork*, *Kindness*, *Nature*. For men living in urban areas, the RBA index is positively associated with resources *Kindness*, *Humour*, *Risk*. No significant correlations were found among men living in the capital.
